# Supplementary material for: Diversity and Traditional Use Knowledge of Medicinal Plants among Communities in the South and South-Eastern Zones of the Tigray Region, Ethiopia
Source: MDPI journal article supplement (doi:10.3390/d14040306), 2022-04-18
Supplement: s1 [file s1]

Archive with 2 entries (2 files):
- Table S1.pdf
- Table S2. List of medicinal plants identified.pdf
