# Supplementary material for: Diversity and Traditional Use Knowledge of Medicinal Plants among Communities in the South and South-Eastern Zones of the Tigray Region, Ethiopia
Source: MDPI journal article supplement (doi:10.3390/d14040306), 2022-04-18
Supplement: s1 [file s1 › Table S1.pdf]

## Supplementary materials

Table S1. Geophysical location and cropping system of the study districts and villages within each district

| District      | Village      | E         | N         | Altitude (masl) | Number of participants <sup>†</sup> | Cropping system         |
|---------------|--------------|-----------|-----------|-----------------|-------------------------------------|-------------------------|
| Degua Tembein | Melfa        | 13°39'01" | 39°07'28" | 2583            | 15 (6)                              | Mixed: Crop - livestock |
|               | Limeat       | 13°36'56" | 39°08'44" | 2571.4          | 15 (5)                              | Mixed: Crop - livestock |
|               | Mayseari     | 13°38'29" | 39°09'23" | 2520            | 15 (8)                              | Mixed: Crop - livestock |
| Alajie        | Daero        | 12°55'50" | 39°31'15" | 2519            | 15 (8)                              | Mixed: Crop - livestock |
|               | Gidmiazan    | 12°54'54" | 39°31'16" | 2594.2          | 15 (8)                              | Mixed: Crop - livestock |
|               | Gerebashilan | 12°55'43" | 39°31'36" | 2455            | 15 (8)                              | Mixed: Crop - livestock |
|               | Chewteame    | 12°53'79" | 39°32'07" | 2744.9          | 15 (7)                              | Mixed: Crop - livestock |
|               | Adihabi      | 13°38'14" | 39°10'2"  | 2531.6          | 15 (5)                              | Mixed: Crop - livestock |
|               | Gerebshaha   | 12°53'25" | 39°32'07" | 2718.4          | 15 (9)                              | Mixed: Crop - livestock |

<sup>†</sup>Number in the bracket stands for number of women participants
