# Supplementary material for: Diversity and Traditional Use Knowledge of Medicinal Plants among Communities in the South and South-Eastern Zones of the Tigray Region, Ethiopia
Source: MDPI journal article supplement (doi:10.3390/d14040306), 2022-04-18
Supplement: s1 [file s1 › Table S2. List of medicinal plants identified.pdf]

Table S2. Lists of medicinal plants used to treat diseases (both humans and animals) in Degua Tembien and Alajie Districts, Tigray

| SN | Scientific name                      | Family name    | Local name | Habit          | Part used                | Used to treat                                          | Preparation Method                                                                                                                                                                | Administ-ration                    | Dose and frequency                                                        |
|----|--------------------------------------|----------------|------------|----------------|--------------------------|--------------------------------------------------------|-----------------------------------------------------------------------------------------------------------------------------------------------------------------------------------|------------------------------------|---------------------------------------------------------------------------|
| 1  | <i>Colutea abyssinica</i>            | Fabaceae       | Ka-ekata   | Tree           | Liquid part              | wound                                                  | Milk extracted and applied onto the wound                                                                                                                                         | Dermal                             | Until cured                                                               |
| 2  | <i>Prunus persica</i> L.             | Rosaceae       | kuk        | Tree           | Leaf                     | Breast feeding strike                                  | Pounding the leaves →clutch                                                                                                                                                       | Oral                               | For 3 days                                                                |
| 3  | <i>Plantago lanceolata</i> L.        | Plantaginaceae | Aklit      | perennial herb | Leaf                     | Eye infection (animals)                                | Crush the leaves and apply into the eye of the cattle using filtering cloth                                                                                                       | Oral                               | Single dose                                                               |
| 4  | <i>Pisum sativum</i> L.              | Fabaceae       | Ater       | Annual herb    | Seed                     | Swelling/wound                                         | Chew the grain and apply the paste on swelled or wounded part                                                                                                                     | Dermal                             | Single dose                                                               |
| 5  | <i>Withania somnifera</i> (L.)       | Solanaceae     | Agol       | Herb           | Leaf<br>Root             | Sun strike<br>Fever                                    | Immerse in water and boil for smoking<br><br>Dry the root, crush it and burn for fumigation                                                                                       | Smoke<br><br>Fumigation            | Three times at evening for one day<br><br>One – three days during evening |
| 6  | <i>Melia azadrachta</i> (L.)         | Meliaceae      | Limo       | Tree           | Leaf                     | Abdominal pain (animals)                               | Crush the leaves, squeeze and drink the fluid                                                                                                                                     | Oral                               | Single one cup dose                                                       |
| 7  | <i>Brassica nigra</i> (L.)           | Brassicaceae   | Senafiche  | Herb           | Seed                     | Asthma/Cough/ Malaria                                  | Mix the seed with garlic, faba bean and pepper then eat                                                                                                                           | Oral                               | Once per day at the morning to empty stomach until cured.                 |
| 8  | <i>Achyranthes aspera</i> (L.)       | Amaranthaceae  | Muchele    | Herb           | Leaf<br><br>Leaf<br>Leaf | Swelled body parts<br><br>Eye infection<br>Tonsillitis | Crush the leaves, mix with butter and apply to the affected part.<br><br>Crush the leaf and spit to the infected eye<br><br>Crush the leaf and place it at the center of his head | Dermal<br><br>Ocular<br><br>Dermal | Single dose<br><br>Single dose<br><br>Single dose                         |
| 9  | <i>Calpurnia aurea</i> (Ait.) Benth. | Fabaceae       | Hitsawts   | Tree           | Leaf<br><br>Root         | Hepatitis<br><br>Wigiat (Cramp)                        | Crush the leaf squeeze and mix with coffee then drink<br><br>Chew the root and swallow the juice or tie with the root                                                             | Oral<br><br>Oral                   | A cup for young and elder; half a cup for children<br><br>Until cured     |

Table S2. Continued

| SN | Scientific name                                    | Family name   | Local name          | Habit | Part used                             | Used to treat                                | Preparation Method                                                                                                                                                    | Administ-ration                     | Dose and frequency                                                                       |
|----|----------------------------------------------------|---------------|---------------------|-------|---------------------------------------|----------------------------------------------|-----------------------------------------------------------------------------------------------------------------------------------------------------------------------|-------------------------------------|------------------------------------------------------------------------------------------|
| 10 | <i>Laggera tomentosa</i><br>(Sch.Bip ex A.Rich.)   | Asteraceae    | Koskoso             | Shrub | Leaf<br><br>Root and leaf<br><br>Leaf | Cough<br><br>Leach (animal)<br><br>Tape worm | Add the leaves on to fire and smoke<br><br>Crush the leaves and roots and spit to the nose of the animal<br><br>Take young leaves, squeeze, mix with coffee and drink | Inhalation<br><br>Nasal<br><br>Oral | Until cured<br><br>One cup per day until completely removed<br><br>One cup – single dose |
| 11 | <i>Dodonaea angustifolia</i><br>L.f.               | Sapindaceae   | Tahses              | Tree  | Leaf                                  | Fractured bone                               | Mix the leaf with juice of Aloe vera and apply                                                                                                                        | Dermal                              | Until cured<br>refresh every three days                                                  |
| 12 | <i>Opuntia ficus-indica</i><br>(L.) Miller.        | Cactaceae     | Beles/Kulkual bahri | Shrub | Fruit<br><br>Clade                    | Heart disease<br><br>Barle (Tinia corporis)  | Eat the fruit before food in the morning<br><br>Rub the affected area with the leaves                                                                                 | Oral<br><br>Dermal                  | Until cured<br><br>Until cured                                                           |
| 13 | <i>Ricinus communis</i> L.                         | Euphorbiaceae | Guile               | Herb  | Leaf                                  | Wound                                        | crush the leaf and apply on the affected part (to avoid development of diseases and insects)                                                                          | Dermal                              | Until cured                                                                              |
| 14 | <i>Allium sativum</i> L.                           | Alliaceae     | Tsaeda shingurti    | Herb  | Bulb                                  | Toothache<br><br>Malaria/asthma/cough        | Rub the jaw for initiation of teeth<br><br>Eat or smell the part, Chew with the affected tooth or brush with it (for children)                                        | Dermal<br><br>Oral                  | Until cured<br><br>Two teaspoons for until cured                                         |
| 15 | <i>Artemisia abyssinica</i><br>Sch.Bip. ex A.Rich. | Asteraceae    | Chena baria         | Herb  | Leaf                                  | Mental illness/<br>Epilepsy                  | Put the leaf on fire for fumigation                                                                                                                                   | Inhalation                          | Until cured                                                                              |

Table S2. continued

| SN | Scientific name                | Family name    | Local name      | Habit   | Part used | Used to treat      | Preparation Method                                                         | Administ-ration | Dose and frequency          |
|----|--------------------------------|----------------|-----------------|---------|-----------|--------------------|----------------------------------------------------------------------------|-----------------|-----------------------------|
| 16 | Kniphofia pumila (Ait.) Kunth. | Asphodelaceae  | Shingurti zibie | Herb    | Bulb      | Joint inflammation | Crush the bulb and apply on the affected part                              | Dermal          | Single dose                 |
|    |                                |                |                 |         | Root      | Wound              | Burn the root to ash, mix it butter and apply the paste onto affected area | Dermal          | Until cured                 |
| 17 | Phytolacca dodecandra L'Herit. | Phytolaccaceae | Shibti          | Climber | Leaf      | Animal lice/ wound | Crush the leaf and wash the sun dry then after wash with clean water.      | Dermal          | Single dose                 |
|    |                                |                |                 |         | Leaf      | Malaria            | Crush very small amount of leaf and drink the fluid                        | Oral            | Half cup until cured        |
| 18 | Rhamnus prinoides L'Herit.     | Rhamnaceae     | Gesho           | Shrub   | Leaf      | Tonsillitis        | Crush the Apply on the center of the head                                  | Dermal          | Single dose                 |
|    |                                |                |                 |         |           | Leeches (animal)   | Crush the leaves, filter and add the juice into the nose                   | Nasal           | One cup per infestation     |
| 19 | Rumex nervosus Vahl            | . Polygonaceae | Hehot           | Shrub   | Leaf      | Itching/ scabies   | Crush the leaf then wash with it                                           | Dermal          | For three or seven days     |
|    |                                |                |                 |         | Stem      | Wound              | Burn the stem into ash and place it on the affected part.                  | Dermal          | Until cured                 |
| 20 | Ruta chalepensis L.            | Rutaceae       | Chena adam      | Herb    | Leaf      | Fever              | Mix/ insert the leaf in a cup of coffee and drink                          | Oral            | One cup                     |
|    |                                |                |                 |         |           | Cough              | Crush the leaf and mix with garlic spit or apply to the nose               | Nasal and oral  | One teaspoon for three days |

Table S2. Continued

| SN | Scientific name                            | Family name  | Local name        | Habit | Part used     | Used to treat             | Preparation Method                                                                                                    | Administ-ration | Dose and frequency             |
|----|--------------------------------------------|--------------|-------------------|-------|---------------|---------------------------|-----------------------------------------------------------------------------------------------------------------------|-----------------|--------------------------------|
| 21 | Nicotiana glauca<br>Graham                 | Solanaceae   | Mendeleyo/chenawi | Shrub | Leaf          | Leaches<br>(animals)      | Crush the leaf and spit the juice to the nose.                                                                        | Nasal           | Single dose                    |
|    |                                            |              |                   |       |               | Animal parasite<br>(lice) | Crush the leaf, mix with water, and wash the entire body.                                                             | Dermal          | Until the lice removed         |
| 22 | Allophylus abyssinicus                     | Sapindaceae  | Shiwaria          | Herb  | Seed          | Tapeworm                  | Crush the seed and drink                                                                                              | Oral            | Single dose                    |
|    |                                            |              |                   |       |               | Hair follicle infection   | Burn/roast the seed grind mix with butter and apply paste on the affected part                                        | Dermal          | Single dose                    |
| 23 | Trigonella foenumgraecum<br>(Bunge) Gurke. | Fabaceae     | Abeake            | Herb  | Seed          | Constipation              | Roast the seed grind mix with water squeeze the filter and eat when you are hungry/starved                            | Oral            | Until cured                    |
|    |                                            |              |                   |       |               | Abdominal pain            | Grind the seed, mix with water and drink                                                                              | Oral            | Until cured                    |
| 24 | Asystasia gangetica<br>(L.)                | Acanthaceae  | Girbia            | Herb  | Leaf          | Herpes simplex virus      | Crush the leaf mix with butter and place on the affected parts                                                        | Dermal          | Until cured                    |
| 25 | Argemone mexicana L.                       | Papaveraceae | Medafe tilian     | Herb  | Leaf and Stem | Wound/sore                | Place the fluid(bleeding) to the affected part then sun dry                                                           | Dermal          | Until cured                    |
|    |                                            |              |                   |       | Seed          | Rabbis                    | Grind the seed, mix with butter, apply the paste to the affected area. Heat up the applied paste for easy absorption. | Dermal          | Until cured                    |
|    |                                            |              |                   |       | Seed          | Hear follicle infection   | Ground the seed, make paste and apply the paste directly to the affected area.                                        | Dermal          | Apply the paste for seven days |

Table S2. Continued

| SN | Scientific name                                                                                                                                    | Family name     | Vernacular name | Habit | Part used                 | Used to treat                                                           | Preparation Method                                                                                                                            | Administration         | Dose and frequency                                   |
|----|----------------------------------------------------------------------------------------------------------------------------------------------------|-----------------|-----------------|-------|---------------------------|-------------------------------------------------------------------------|-----------------------------------------------------------------------------------------------------------------------------------------------|------------------------|------------------------------------------------------|
| 26 | <i>Silene macrosolen</i><br>Steud. ex A. Rich.                                                                                                     | Caryophyllaceae | Saero saero     | Herb  | Root                      | Snake repellent                                                         | Put the root on fire for fumigation                                                                                                           | Inhalation             | Single dose                                          |
| 27 | <i>Otostegia integrifolia</i><br>Benth.                                                                                                            | Lamiaceae       | Chiendog        | Shrub | Root<br>All parts         | Repellent<br>Abdominal cramp                                            | Put the root on fire for fumigation<br><br>Crush, filter and drink the juice                                                                  | Inhalation<br><br>Oral | Single dose<br><br>One cup every morning until cured |
| 28 | <i>Ziziphus spina-christi</i><br>(L.) Desf.                                                                                                        | Rhamnaceae      | Giba            | Tree  | Leaf                      | Dandruff                                                                | Crush the leaf and wash the head                                                                                                              | Dermal                 | For three days                                       |
| 29 | <i>Zingiber officinale</i><br>Roscoe.                                                                                                              | Zingiberaceae   | Zinjible        | Herb  | Root<br>Seed              | Abdominal pain<br>Tooth ache                                            | Chew the root<br><br>Chew the seed                                                                                                            | Oral<br><br>Oral       | Until cured<br><br>Single dose                       |
| 30 | <i>Olea europaea</i> L.<br>subsp. <i>cuspidata</i> (Wall.<br>ex G.Don) Cif.,<br><i>L'Olivicoltore</i> +<br><i>Otostegia integrifolia</i><br>Benth. | Oleaceae        | Awlie           | Tree  | Leaf                      | Abdominal pain                                                          | Cut the young leaf crush squeeze and drink                                                                                                    | Oral                   | Single dose                                          |
| 31 | <i>Rumex nepalensis</i><br>Spreng.                                                                                                                 | Polygonaceae    | shembacita      | Herb  | Root<br>Leaf<br>All parts | Abdominal pain<br><br>Nasal infection<br><br>Ring worm ( <i>Tifas</i> ) | Chew the root and swallow the juice.<br><br>Pounding the leaves → clutch it into cup<br><br>Rub the affected part by warming the leaf on fire | Oral<br><br>Dermal     | Until cured<br><br>Single dose                       |
| 32 | <i>Ocimum lamiifolium</i><br>Hochst. ex Benth.+<br><i>Ruta chalepensis</i> L.                                                                      | Lamiaceae       | Demekasie       | Herb  | Leaf                      | Fever                                                                   | Mix/ insert the leaf in a cup of coffee and drink                                                                                             | Oral                   | One cup                                              |

Table S2. Continued

| SN | Scientific name                                                                                        | Family name               | Vernacular name | Habit | Part used                         | Used to treat                                                   | Preparation Method                                                                                                                            | Administration     | Dose and frequency             |
|----|--------------------------------------------------------------------------------------------------------|---------------------------|-----------------|-------|-----------------------------------|-----------------------------------------------------------------|-----------------------------------------------------------------------------------------------------------------------------------------------|--------------------|--------------------------------|
| 33 | <i>Olea europaea</i> L. +<br><i>Eucalyptus globules</i><br>Labill. + <i>Schinus</i><br><i>molle</i> L. | Oleaceae                  | Awlie           | Tree  | Leaf                              | Fever                                                           | Mix with water and put on fire for fumigation                                                                                                 | Inhalation         | Single dose                    |
| 34 | <i>Rumex nepalensis</i><br>Spreng.                                                                     | Polygonaceae              | shembacita      | Herb  | Root<br><br>Leaf<br><br>All parts | Abdominal pain<br><br>Nasal infection<br><br>Ring worm (Tifsas) | Chew the root and swallow the juice.<br><br>Pounding the leaves → clutch it into cup<br><br>Rub the affected part by warming the leaf on fire | Oral<br><br>Dermal | Until cured<br><br>Single dose |
| 35 | <i>Ocimum lamiifolium</i><br>Hochst. ex Benth.+<br><i>Ruta chalepensis</i> L.                          | Lamiaceae                 | Demekasie       | Herb  | Leaf                              | Fever                                                           | Mix/ insert the leaf in a cup of coffee and drink                                                                                             | Oral               | One cup                        |
| 36 | <i>Olea europaea</i> L. +<br><i>Eucalyptus globules</i><br>Labill. + <i>Schinus</i><br><i>molle</i> L. | Oleaceae                  | Awlie           | Tree  | Leaf                              | Fever                                                           | Mix with water and put on fire for fumigation                                                                                                 | Inhalation         | Single dose                    |
| 37 | <i>Zehneria scabra</i> (L.f.)<br>Sond. + <i>Anethum</i><br><i>graveolens</i> L.                        | Cucurbitaceae<br>Apiaceae | Hafaflo         | Herb  | Leaf                              | Tuberculosis                                                    | Crush the leaf and place on the affected parts                                                                                                | Dermal             |                                |
| 38 | <i>Euphorbia abyssinica</i><br>J.F.Gmel.                                                               | Euphorbiaceae             | Kulqual         | Tree  | Leaf<br><br>Flower                | Cramp<br><br>Malaria                                            | Delineate the affected part not to expand (for animal)<br><br>Grind the red flower (half spoon) mix with honey and eat                        | Dermal<br><br>Oral | Until cured<br><br>Until cured |

Table S2. Continued

| SN | Scientific name                                    | Family name    | Vernacular name | Habit | Part used         | Used to treat                                                                              | Preparation Method                                                                                                                                                                                     | Administration                                       | Dose and frequency                                   |
|----|----------------------------------------------------|----------------|-----------------|-------|-------------------|--------------------------------------------------------------------------------------------|--------------------------------------------------------------------------------------------------------------------------------------------------------------------------------------------------------|------------------------------------------------------|------------------------------------------------------|
| 39 | <i>Chenopodium murale</i> L.                       | Chenopodiaceae | Hamli qiweo     | Herb  | Leaf              | Wound, Swellings                                                                           | Tie the leaf                                                                                                                                                                                           | Dermal                                               | until cured                                          |
| 40 | <i>Cucumis ficifolius</i> A. Rich.                 | Cucurbitaceae  | Ramboambo       | Herb  | Fruit             | Swellings, Wound                                                                           | Insert your finger into the fruit                                                                                                                                                                      | Dermal                                               | Until cured                                          |
| 41 | <i>Lepidium sativum</i> L.                         | Brassicaceae   | Shinfae         | Herb  | Seed              | Bacteria skin infection<br><br>Herpes simplex virus<br><br>Hemorrhoid                      | Mix with honey and place on the affected parts<br><br>Grind the seed and place the floor on affected part<br><br>Burn the stem into ash and apply the ash on the affected part                         | Dermal<br><br>Dermal<br><br>Dermal                   | Until cured<br><br>Until cured<br><br>Until cured    |
| 42 | <i>Solanum hastifolium</i> Hochst. ex Dunal in DC. | Solanaceae     | Alalmo kalbi    | Shrub | Leaf<br><br>Fruit | Bacteria skin infection<br><br>Otitis media                                                | Crush the leaf and tie it onto the affected parts<br><br>Squeeze matured fruits and apply the juice into ear                                                                                           | Dermal<br><br>Dermal                                 | Until cured<br><br>Until cured                       |
| 43 | <i>Ajuga integrifolia</i> Buch-Ham.                | Lamiaceae      | Endifdif        | Herb  | Leaf              | Abdominal pain                                                                             | Crush the leaf squeeze and drink the fluid                                                                                                                                                             | Oral                                                 | One tin for young and elder; one cup for children    |
| 44 | <i>Datura stramonium</i> L.                        | Solanaceae     | Mestenagr       | Herb  | Fruit<br><br>Leaf | Toothache<br><br>Cramp<br><br>Wound with burning sensation<br><br>Bacterial skin infection | Place/put the fruit on fire for fumigation<br><br>Rub the affected part with the leaf<br><br>Crush the leaf and apply paste on the affected parts<br><br>Crush the leaf and tie in the wound/ swelling | Inhalation<br><br>Dermal<br><br>Dermal<br><br>Dermal | Until cured<br><br><br>Single dose<br><br>Until cure |

Table S2. Continued

| SN | Scientific name                                  | Family name   | Vernacular name | Habit | Part used                    | Used to treat                                           | Preparation Method                                                                                                                                                  | Administration                    | Dose and frequency                                     |
|----|--------------------------------------------------|---------------|-----------------|-------|------------------------------|---------------------------------------------------------|---------------------------------------------------------------------------------------------------------------------------------------------------------------------|-----------------------------------|--------------------------------------------------------|
| 45 | <i>Sida schimperiana</i><br>Hochst. ex A. Rich.  | Malvaceae     | Tiffraria       | Shrub | Root                         | Cramp<br><br>Tooth ache                                 | Delineate the affected part not to expand (for animal)<br><br>Chew the root                                                                                         | Dermal<br><br>Oral                | Until cured<br><br>Until cure                          |
| 46 | <i>Asparagus africanus</i><br>Lam.               | Asparagaceae  | Kastanito       | Herb  | Leaf<br><br>Root             | Swelling in lower neck (animals)<br><br>Dislocated bone | Crush the leaf and insert into the affected part through surgery close with the powder inside and then wash clearly after some days<br><br>Tie the root in the tail | Dermal<br><br>Dermal              | Single dose<br><br>Until cured                         |
| 47 | <i>Croton macrostachyus</i><br>Hochst. ex Delile | Euphorbiaceae | Tambok          | Tree  | Leaf<br><br>Leaf<br><br>Leaf | Hemorrhoids<br><br>Bleeding<br><br>Leech (animal)       | Crush the leaf and place on the affected parts<br><br>Crush the young leaf (without-water) and tie on the affected<br><br>Crush the leaf and spit into the nose     | Dermal<br><br>Dermal<br><br>Nasal | Until cured<br><br>Until cured<br><br>Two – three days |
| 48 | <i>Acacia abyssinica</i>                         | Fabaceae      | Che'a           | Tree  | Leaf and bark<br><br>Leaf    | Eye infection<br><br>Hear follicle infection            | The leaves and bark crushed, squeeze and spit to the affected eye.<br><br>Crush the leaf, mix with butter and apply the paste on affected part                      | Ocular<br><br>Dermal              | Single dose<br><br>Until cure                          |

Table S2. Continued

| SN | Scientific name              | Family name   | Vernacular name | Habit | Part used     | Used to treat                   | Preparation Method                                                          | Administration | Dose and frequency                            |
|----|------------------------------|---------------|-----------------|-------|---------------|---------------------------------|-----------------------------------------------------------------------------|----------------|-----------------------------------------------|
| 49 | Aloe megalacantha Bark.      | Aloaceae      | Ere             | Shrub | Root          | Dislocated bone                 | Tie the root in the tail                                                    | Dermal         | Until cured                                   |
|    |                              |               |                 |       | Clade         | Abdominal cramp/Ameoba          | Crush, squeeze, filter and drink the juice                                  | Oral           | Human – ½ cup                                 |
|    |                              |               |                 |       | Fluid         | Gonorrhea                       | Apply fluid on the affected area                                            | Dermal         | Animal – one cup<br>Until cure                |
| 50 | Sorghum bicolor (L.) Moench. | Poaceae       | Leqa/Mashila    | Herb  | Seed          | Almaz belechira (Herpes zoster) | Soak it in water boil and wash with that water                              | Dermal         | For seven days                                |
| 51 | Vicia faba L.                | Fabaceae      | Ater, alqay     | Herb  | Root          | Bacteria skin infection         | Chew and place on the affected parts                                        | Dermal         | Until cured                                   |
| 52 | Zehneria scabra (L.f.) Sond. | Cucurbitaceae | Hafaflo         | Herb  | Leaf and root | Jerbado                         | Crush the leaf and root mix one spoon with milk boil then drink             | Oral           | One cup                                       |
|    |                              |               |                 |       | Leaf          | Mich (sun strike)               | Mix its leaves with leaves of eucalyptus and olive, boil in water and smoke | Smoking        | Three times per day for three days at evening |
|    |                              |               |                 |       | Bark          | Wound                           | Grind the bark, mix with butter and apply to the affected part              | Dermal         | Until cured                                   |
| 53 | Buddleja polystachya Fresen. | Buddlejaceae  | Metere          | Shrub | Leaf          | Headache                        | Crush the leaf mix with butter and place on the affected parts              | Dermal         | Two – three days                              |
|    |                              |               |                 |       |               | Leech                           | Crush the leaf and spit into the nose                                       | Nasal          |                                               |

| SN | Scientific name                                         | Family name   | Local name     | Habit | Part used             | Used to treat                              | Preparation Method                                                                                     | Administration     | Dose and frequency                              |
|----|---------------------------------------------------------|---------------|----------------|-------|-----------------------|--------------------------------------------|--------------------------------------------------------------------------------------------------------|--------------------|-------------------------------------------------|
| 54 | <i>Leucas abyssinica</i> (Benth.) Briq.                 | Lamiaceae     | Siwa karni     | Shrub | A/B                   | Eye infection                              | Bark of Che'a Kolla, will be crushed squeeze and spit to the affected eye                              | Ocular             | Single dose                                     |
| 55 | <i>Clerodendrum myricoides</i> (Hochst.) R.Br. ex Vatke | Lamiaceae     | Shiwha         | Shrub | Root                  | Arthritis                                  | Burn the root for smoke                                                                                | Fumigation         | For three days                                  |
| 56 | <i>Juniperus procera</i> Hochst. ex. Endl.              | Cupressaceae  | Tshdi          | Tree  | Leaf                  | Wequie (stubbing)                          | Crush the leaf and spit /drink) on mouth                                                               | Oral               | Single dose                                     |
|    |                                                         |               |                |       | Leaf                  | Abdominal cramp                            | Crush the leaf then drink it can also be mixed with shanfae                                            | Oral               | Single dose                                     |
| 57 | <i>Cyphostema adenocaula</i> (Steud. ex A.Rich.)        | Vitaceae      | Aserkuca       | Herb  | Root                  | Wound                                      | Grind the root and apply on the affected part<br><br>Crush the leaf, mix with water, filter, and drink | Dermal<br><br>Oral | Until cured<br><br>Single dose on empty stomach |
| 58 | <i>Clematis hirsute</i> Perr.                           | Ranunculaceae | Haregrasha     | Herb  | Leaf                  | Almaz belechira                            | Burn the leaf mix with butter the apply to the affected parts                                          | Dermal             | Single dose                                     |
|    |                                                         |               |                |       | Leaf, steam and seeds | (Herpes Zoster)<br><br>Mitich (sun strike) | Boil the parts in water for fumigation                                                                 | Fumigation         | Single dose                                     |
| 59 | <i>Osyris quadrpartita</i>                              | Santalaceae   | Qerets         | Shrub | Leaf                  | Cuts and wounds                            | Crush the whole leaf /without any hole) mix with whey and drink.                                       | Oral               | One cup                                         |
| 60 | <i>Pappea capensis</i>                                  | Sapindaceae   | Tish-bealalito | Shrub | Leaf                  | Hemorrhoids                                | Crush the leaf and place on the affected parts                                                         | Dermal             | Until cured                                     |
| 61 | <i>Verbena officinalis</i> L.                           | Verbenaceae   | Atush/Fostsdak | Herb  | Root                  | Abdominal pain and Tonsillitis             | Crush the root squeeze and drink the fluid                                                             | Oral               | For seven days                                  |

Table S2. Continued

| SN | Scientific name                                         | Family name   | Local name        | Growth Habit | Part used           | Used to treat                                      | Preparation Method                                                                                              | Administration               | Dose and frequency                                              |
|----|---------------------------------------------------------|---------------|-------------------|--------------|---------------------|----------------------------------------------------|-----------------------------------------------------------------------------------------------------------------|------------------------------|-----------------------------------------------------------------|
| 62 | <i>Hypoestes forskoolii</i>                             | Acanthaceae   | Girbia            | Herb         | Leaf                | Merzen (Migraine)                                  | Leaf and root will be dried crushed placed in fire for fumigation                                               | Fumigation                   | Three days during evening                                       |
| 63 | <i>Clutia abyssinica</i> Jaub. & Spach.                 | Euphorbiaceae | Hirtmtmo          | Shrub        | Root, Stem and Seed | Joint inflammation                                 | Seed will be roasted, crushed mix with butter and placed in the affected parts                                  | Dermal                       | 3-7 days                                                        |
| 64 | <i>Eucalyptus globules</i> Labill.                      | Myrtaceae     | Tsaeda kelamintos | Tree         | Leaf                | Migraine<br>Fever                                  | The leaf will be mixed with <i>haregrasha</i> placed in boiled water for fumigation                             | Smoking                      | For three days at evening                                       |
| 65 | <i>Solanum nigrum</i> L.                                | Solanaceae    | Engulo            | Shrub        | Root, seed (fruit)  | Leeches – animals<br>Abdominal cramp<br>Tooth ache | Roast the seed, grind it, mix with water and drink the animal.<br><br>Chew the root<br><br>Chew the root        | Oral<br><br>Oral<br><br>Oral | Single dose<br><br>Until cured from the pain<br><br>Single dose |
| 66 | <i>Nicotiana glauca</i> Graham                          | Solanaceae    | Mendeleyo         | Shrub        | Leaf                | Leeches (animal)<br><br>Animal parasite – lice     | Crush the leaf and spit the juice to the nose.<br><br>Crush the leaf, mix with water, and wash the entire body. | Nasal<br><br>Dermal          | One drop<br><br>until the lice removed                          |
| 67 | <i>Otostegia fruticosa</i> (Forssk.) Schweif.ex Penzing | Lamiaceae     | Chamo             | Shrub        | All part            | Tonsillitis<br><br>Eye infection (animals)         | Crush the leaf and drink the juice.<br><br>Chew the part and spit the juice onto the infected eye               | Oral<br><br>Ocular           | One cup – single dose<br><br>Single dose                        |
| 68 | <i>Sida schimperiana</i> Hochst. ex A.Rich.             | Malvaceae     | Tsfraria          | Shrub        | Leaf and Root       | Tooth ache                                         | Chew the root                                                                                                   | Oral                         | Until cured                                                     |

Table S2. continued

| SN | Scientific name                           | Family name    | Local name   | Habit      | Part used | Used to treat           | Preparation Method                                                                     | Administration | Dose and frequency                  |
|----|-------------------------------------------|----------------|--------------|------------|-----------|-------------------------|----------------------------------------------------------------------------------------|----------------|-------------------------------------|
| 69 | <i>Dodonaea angustifolia</i>              | Sapindaceae    | Tahses       | Shrub      | Seed      | Wound                   | Roast the seed, crush it, mix it with butter and apply the paste on affected part      | Dermal         | Until it cured                      |
|    |                                           |                |              |            | leave     | Hear follicle infection | Cut the leaf dry it crush and mix with butter apply paste on the affected part         | Dermal         | Single dose                         |
| 70 | <i>Discopodium penninervium</i>           | Solanaceae     | Alhim        | Tree       | Seed      | Urinary tract infection | Dried the seed, grind it, mix with the butter and apply the paste to the affected area | Dermal         | Single dose                         |
| 71 | <i>Olea europaea</i>                      | Oleaceae       | Awlie        | Shrub      | Leaf      | tooth ache              | Crush the leaf, chew and hold it on affected tooth for sometimes.                      | Oral           | Until cured                         |
| 72 | <i>Dovyalis abyssinica</i> (A.Rich.) Warb | Flacourtiaceae | Mengolhats   | Tree/shrub | Seed      | Abdominal cramp         | Eat the seed or grind the seed, mix with water and drink.                              | Oral           | One cup each morning until cured    |
| 73 | <i>Linum usitatissimum</i> L.             | Linaceae       | Entatie      | Herb       | Seed      | Constipation            | Roast the seed, smash, mix with water and drink.                                       | Oral and       | One cup for constipation until cure |
|    |                                           |                |              |            |           | Swelling                | Crush the seed and apply on the wound.                                                 | Dermal         | Until cure                          |
| 74 | <i>Nigella sativa</i> L.                  | Ranunculaceae  | Tselim kimem | Herb       | Seed      | Abdominal cramp         | Crush the seed, mix with water and drink to empty stomach                              | Oral           | One cup single dose                 |
| 75 | <i>Rosa abyssinica</i>                    | Rosaceae       | Kaga         | Shrub      | Root      | Arthritis               | Grind the root, boil and smoke                                                         | Smoking        | For three days                      |
| 76 | <i>Carissa spinarum</i> L.                | Apocynaceae    | Eigam        | Shrub      | Root      | Buda/evil eye           | Mix the root with Hangaro Midri, boil and smoke.                                       | Smoking        | Single dose                         |
| 77 | <i>Rubus steudneri</i> Schweinf           | Rosaceae       | Mengolil     | Shrub      | Seed      | Hear disease            | Heart problem –eat the seed or fruit                                                   | Oral           | Until cured                         |

Table S2. Continued

| SN | Scientific name                    | Family name      | Local name   | Habit | Part used  | Used to treat                   | Preparation Method                                                     | Administration | Dose and frequency                |
|----|------------------------------------|------------------|--------------|-------|------------|---------------------------------|------------------------------------------------------------------------|----------------|-----------------------------------|
| 78 | <i>Solanum nigrum</i> L.           | Solanaceae       | alalimo      | Herb  | Leaf       | Wound                           | Crush leaves and tie on the wound                                      | Dermal         | Single dose                       |
| 79 | <i>Grewia ferruginea</i>           | Tiliaceae        | Meleglaga    | Tree  | Leaf       | Quasha ( <i>Tinia capitis</i> ) | Crush leaves, filter and apply to the affected area                    | Dermal         | For three days                    |
| 80 | <i>Verbascum sinaiticum</i> Benth. | Scrophulariaceae | Tirnakya     | Herb  | Leaf, Bark | Tonsillitis<br>Wound            | Chew the leaf and spit to the mouth of the child                       | Oral, Dermal   | For three days                    |
| 81 | <i>Verbena officinalis</i> L.      | Verbenaceae      | Atush        | Herb  | Root       | Abdominal cramp                 | Abdominal pain-chew the root or crush squeeze and drink the fluid      | Oral           | One –two cup single dose          |
| 82 | <i>Hagenia abyssinica</i>          | Rosaceae         | Habi         | Tree  | Seed       | Tape worm                       | Crush the seed, squeeze and drink the fluid                            | Oral           | One cup- single dose              |
| 83 | <i>Nicotina tabacum</i> L.         | Solanaceae       | Timbho       | Shrub | Leaf       | Leeches                         | Crush the leaf and spit to the nose                                    | Nasal          | Half a cup single dose            |
| 84 | <i>Pavetta oliveriana</i>          | Rubiaceae        | Shime'ya     | Shrub | Leaf       | Hepatitis                       | Mix the leaf with water boil it, filter, and mix with whey then drink  | Oral           | One cup every morning until cured |
| 85 | <i>Verbascum sinaiticum</i> Benth. | Scrophulariaceae | Tirnakya     | Herb  | root       | Tonsillitis<br>Zewra            | Chew the root<br>Crush the root, mix with water and wash affected area | Oral<br>Dermal | Single dose<br>Single dose        |
| 86 | <i>Cicer arietinum</i>             | Fabaceae         | Shinbra      | Herb  | Seed       | Malaria                         | Mix with <i>shenafit</i> , pepper and garlic and eat                   | Oral           | For three days during morning     |
| 87 | <i>Phoenix canariensis</i>         | Arecaceae        | Senti semhal | Shrub | Leaf       | Tooth ache                      | Chew the leaf                                                          | Oral           | One time                          |

Table S2. Continued

| SN | Scientific name                                                                                                               | Family name                                            | Local name                   | Habit | Part used | Used to treat                | Preparation Method                                                                  | Administration | Dose and frequency                                              |
|----|-------------------------------------------------------------------------------------------------------------------------------|--------------------------------------------------------|------------------------------|-------|-----------|------------------------------|-------------------------------------------------------------------------------------|----------------|-----------------------------------------------------------------|
| 88 | <i>Lens culinaris</i>                                                                                                         | Fabaceae                                               | Lentil (Birsen)              | Herb  | Seed      | Wound with burning sensation | Roast the seed, grind it, mix with butter and apply the paste on the affected parts | Dermal         | Single dose                                                     |
| 89 | <i>Ficus palmata</i> Forssk.                                                                                                  | Moraceae                                               | Beles Adgi                   | Shrub | Leaf      | Rabbis                       | Dry the leaf, crush it, mix with butter and apply the paste onto affected area      | Dermal         | Until cured                                                     |
| 90 | <i>Henopodium murale</i> L.                                                                                                   | Chenopodiaceae                                         | Hamli Kibioo                 | Herb  | Leaf      | Quasha (Tinia capitis)       | Crush the leaf squeeze and wash the head                                            | Dermal         | Until cured                                                     |
| 91 | <i>Citrus aurantifolia</i> (Christm.), Swingle + <i>Solanum nigrum</i> L.                                                     | Rutaceae + Solanaceae                                  | Lomin and or ungule          | Tree  | Fruit     | Nail fungus infection        | Insert your affected finger in the fruit                                            | Dermal         | Until cured                                                     |
| 92 | <i>Rumex nervosus</i> Vahl+ <i>Lepidium sativum</i> L. + <i>Citrus aurantifolia</i> (Christm.) + <i>Plumbago zeylanica</i> L. | Polygonaceae + Brassicaceae + Rutaceae +Plumbaginaceae | Hehot, shanfae, lomin, Aflih | Shrub | All parts | Herpes simplex virus         | Soak in water squeeze it fill it in a bottle and wash                               | Dermal         | For seven days                                                  |
| 93 | <i>Dodonaea angustifolia</i> + <i>Becium grandiflorum</i> (Lam.) Pic.Serm.                                                    | Sapindaceae + Lamiaceae                                | Tahses +tebeb                | Shrub | Leaf      | Fractured bone               | Tie young leaf of tebeb and tahses on broken bone using appropriate materials       | Dermal         | Until cured - change the tie every three days to avoid wounding |
| 94 | <i>Merendra bengalensis</i> (Roxb.) Benth. + <i>Hypericum revolutum</i> Vahl.                                                 | Lamiaceae +Hypericaceae                                | Mesaguh, qotsli Abede        | Shrub | Leaf/Root | Epilepsy                     | Crush the roots and leaves, squeeze and eat with injera                             | Oral           | Until cured                                                     |

Table S2. Continued

| SN | Scientific name                                                                      | Family name                           | Local name                 | Habit             | Part used | Used to treat | Preparation Method                                                   | Administration     | Dose and frequency |
|----|--------------------------------------------------------------------------------------|---------------------------------------|----------------------------|-------------------|-----------|---------------|----------------------------------------------------------------------|--------------------|--------------------|
| 95 | Withania somnifera (L.) + Eucalyptus globules Labill. + Zehneriascabra (Linn.) Sond. | Solanaceae+ Myrtaceae + Cucurbitaceae | Agol, Bahirzaf, Haregrasha | Herb, Tree, Shrub | Leaf      | Fever         | Boil the leaves in water and smoke                                   | Fumigation smoking | One-three days     |
| 96 | Rosa abyssinica + Carissa spinarum L.                                                | Rosaceae + Apocynaceae                | Kaga , Eigam               | Shrub             | Stem      | Arthritis     | Put the stem on fire for fumigation                                  | Fumigation         | Single dose        |
| 97 | Ricinus communis + Coffea arabica                                                    | Euphorbiaceae + Rubiaceae             | Gulie, Buna,               | Shrub             | Leaf      | Wound         | Crush castor, mix with Coffee powder then apply on the affected part | Dermal             | Single dose        |
